# Supplementary material for: Larval settlement and metamorphosis of Mytilus coruscus in response to varying bacterial capsular polysaccharide
Source: Frontiers journal article supplement (doi:10.3389/fmars.2023.1089024), 2023-01-23
Supplement: Data_Sheet_1.PDF [file Data_Sheet_1.PDF]

## Supplementary Material

**TABLE S1.** Correlation analysis of between larval settlement and metamorphosis and bacterial density, biofilm thickness, and CPS content.

|                                  | Bacterial density |       | Biofilm thickness |       | CPS content |       |
|----------------------------------|-------------------|-------|-------------------|-------|-------------|-------|
|                                  | r                 | p     | r                 | p     | r           | p     |
| Settlement and metamorphosis (%) | -0.064            | 0.596 | -0.245            | 0.328 | 0.592       | 0.01* |

**TABLE S2.** Effects of polysaccharides from different bacteria on settlement and metamorphosis of marine invertebrate larvae.

| Type of polysaccharide            | Bacteria                         | Marine invertebrates             | Function                                                                                                    | Reference             |
|-----------------------------------|----------------------------------|----------------------------------|-------------------------------------------------------------------------------------------------------------|-----------------------|
| Exopolysaccharide                 | <i>Pseudomonas</i> sp. strain S9 | <i>Ciona intestinalis</i>        | Decrease in exopolysaccharide reduced larval metamorphosis rate                                             | Szewzyk et al., 1991  |
| Exopolysaccharide                 | <i>Pseudomonas marina</i>        | <i>Janua brasiliensis</i>        | Induce larval settlement and metamorphosis                                                                  | Kirchman et al., 1982 |
| Exopolysaccharide or glycoprotein | <i>Alteromonas</i> sp. 1         | <i>Mytilus galloprovincialis</i> | A surface-bound cue on the biofilm might be associated with the bacterial exopolysaccharide or glycoprotein | Bao et al., 2007      |

|                         |                                     |                          |                                                                                                                                                                                                                                                                                          |                         |
|-------------------------|-------------------------------------|--------------------------|------------------------------------------------------------------------------------------------------------------------------------------------------------------------------------------------------------------------------------------------------------------------------------------|-------------------------|
| Colanic acid            | <i>Pseudoalteromonas marina</i>     | <i>Mytilus coruscus</i>  | Bacterial polysaccharide biosynthesis-related gene 01912 may regulate mussel settlement by producing CA via the coordination of c-di-GMP                                                                                                                                                 | Peng et al., 2020       |
| Cellulose/ Colanic acid | <i>Pseudoalteromonas marina</i>     | <i>Mytilus coruscus</i>  | Bacterial cellulose synthesis gene manipulates c-di-GMP that controls secretion of exopolysaccharides including cellulose and colanic acid , and regulates mussel settlement. Deletion of <i>AT00_17125</i> resulted in reduced capsular polysaccharide production and larval settlement | Liang et al., 2021      |
| Colanic acid            | <i>Pseudoalteromonas lipolytica</i> | <i>Mytilus coruscus</i>  | metamorphosis LPS directly induced larval metamorphosis. Lipopolysaccharide in OMVs can induce larval metamorphosis                                                                                                                                                                      | Zeng et al., 2015       |
| Lipopolysaccharide      | <i>Pseudoalteromonas marina</i>     | <i>Mytilus coruscus</i>  |                                                                                                                                                                                                                                                                                          | Wu et al., 2022         |
|                         | <i>Cellulophaga lytica</i>          | <i>Hydroides elegans</i> |                                                                                                                                                                                                                                                                                          | Freckelton et al., 2022 |

---
